# Supplementary material for: Tetranuclear copper(ii) cubane complexes derived from self-assembled 1,3-dimethyl-5-(o-phenolate-azo)-6-aminouracil: structures, non-covalent interactions and magnetic property
Source: Royal Society of Chemistry journal article supplement (doi:10.1039/d0nj05232a), 2021-01-01
Supplement: d0nj05232a1.pdf [file d0nj05232a1.pdf]

Electronic Supplementary Information (ESI) for New Journal of Chemistry, RSC

## Electronic Supplementary Information (ESI)

### Tetranuclear copper(II) Cubane Complex Derived from Self-Assembled 1,3-Dimethyl-5-(*o*-phenolate-azo)-6-aminouracil: Structures, non-Covalent Interactions and Magnetic Property

Nishithendu Bikash Nandi,<sup>a</sup> Atanu Purkayastha,<sup>a</sup> Shaktibrata Roy,<sup>a</sup> Julia Kłak,<sup>\*b</sup> Rakesh Ganguly,<sup>\*c</sup> Ibon Alkorta,<sup>\*d</sup> Tarun Kumar Misra<sup>\*a</sup>

<sup>a</sup>Department of Chemistry, National Institute of Technology Agartala 799046, Tripura, India

<sup>b</sup>Faculty of Chemistry, University of Wrocław, Wrocław 50383, Poland

<sup>c</sup>Shiv Nadar University, NH - 91, Tehsil Dadri, Gautam Buddha Nagar, Uttar Pradesh – 201314, India

<sup>d</sup>Instituto de Química Médica, CSIC, Juan de la Cierva, 3, 28006 Madrid, Spain

#### Contents

|                                                                                                                                                                                                                                                                                                                                                 | Figures/Tables | Pages |
|-------------------------------------------------------------------------------------------------------------------------------------------------------------------------------------------------------------------------------------------------------------------------------------------------------------------------------------------------|----------------|-------|
| <b>Figure S1.</b> IR spectrum of H <sub>2</sub> L                                                                                                                                                                                                                                                                                               |                | 2     |
| <b>Figure S2.</b> IR spectrum of [Cu <sup>II</sup> L] <sub>4</sub> 2H <sub>2</sub> O                                                                                                                                                                                                                                                            |                | 2     |
| <b>Figure S3.</b> <sup>1</sup> H NMR spectrum of H <sub>2</sub> L                                                                                                                                                                                                                                                                               |                | 3     |
| <b>Figure S4.</b> <sup>13</sup> C NMR spectrum of H <sub>2</sub> L                                                                                                                                                                                                                                                                              |                | 3     |
| <b>Scheme S1.</b> Possible tautomeric forms of H <sub>2</sub> L                                                                                                                                                                                                                                                                                 |                | 4     |
| <b>Figure S5.</b> (A) UV-vis spectra of H <sub>2</sub> L, <b>1</b> at different buffer solutions; (B) Plot of absorbance vs pH of different buffer solutions at (a) 431 nm, (b) 447 nm, and (c) 403 nm.                                                                                                                                         |                | 5     |
| <b>Figure S6.</b> H-bonded network present in H <sub>2</sub> L                                                                                                                                                                                                                                                                                  |                | 6     |
| <b>Figure S7.</b> Stacking feature of H <sub>2</sub> L.                                                                                                                                                                                                                                                                                         |                | 7     |
| <b>Figure S8.</b> (A) AIM molecular graph and (B) NCI plot of the intramolecular interaction in the molecule, <b>1</b> . The green, red and blue dots in the molecular graph indicate the position of the bond, ring and cage critical points. The green colored isosurface of the NCIplot is an indication of moderate attractive interaction. |                | 8     |
| <b>Table S1.</b> pK <sub>a</sub> value of H <sub>2</sub> L                                                                                                                                                                                                                                                                                      |                | 9     |
| <b>Table S2.</b> Bond lengths (Å) for H <sub>2</sub> L                                                                                                                                                                                                                                                                                          |                | 9     |
| <b>Table S3.</b> Bond angles (°) for H <sub>2</sub> L                                                                                                                                                                                                                                                                                           |                | 10    |
| <b>Table S4.</b> H-bond parameters present in H <sub>2</sub> L                                                                                                                                                                                                                                                                                  |                | 11    |
| <b>Table S5.</b> Bond lengths (Å) for [Cu <sup>II</sup> L] <sub>4</sub> 2H <sub>2</sub> O                                                                                                                                                                                                                                                       |                | 11    |
| <b>Table S6.</b> Bond angles (°) for [Cu <sup>II</sup> L] <sub>4</sub> 2H <sub>2</sub> O                                                                                                                                                                                                                                                        |                | 12    |
| <b>Table S7.</b> Tetranuclear copper(II) clusters of the present study and the literature (Ref. 24a)                                                                                                                                                                                                                                            |                | 12    |

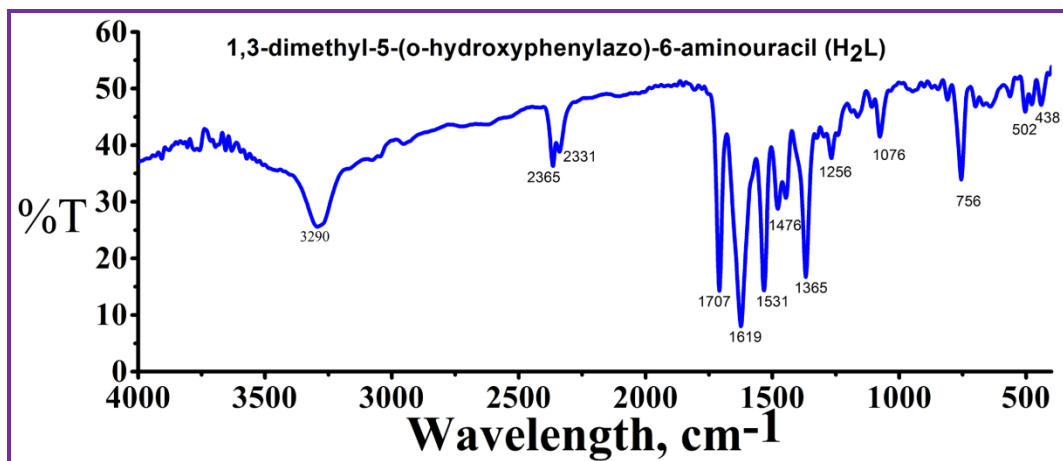

Figure S1. IR spectrum of H<sub>2</sub>L, 1

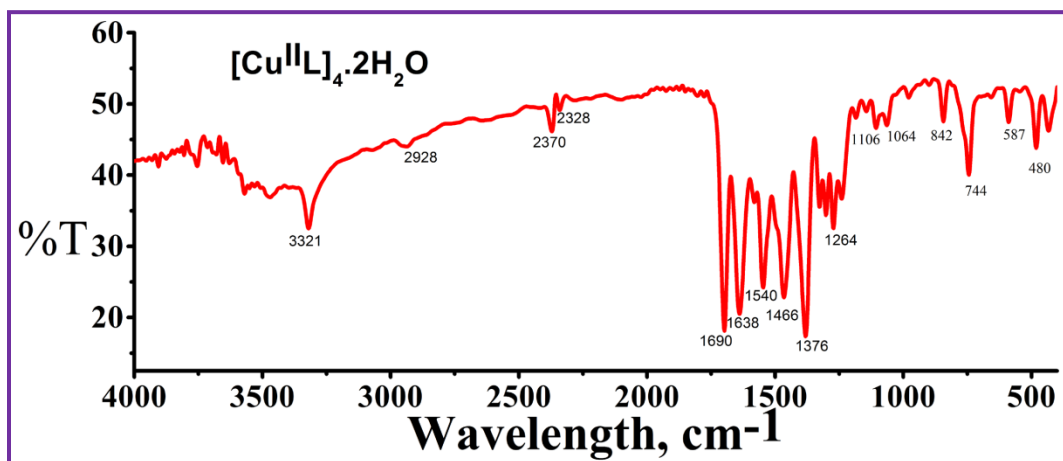

Figure S2. IR spectrum of [Cu<sup>II</sup>L]<sub>4</sub> · 2H<sub>2</sub>O, 2

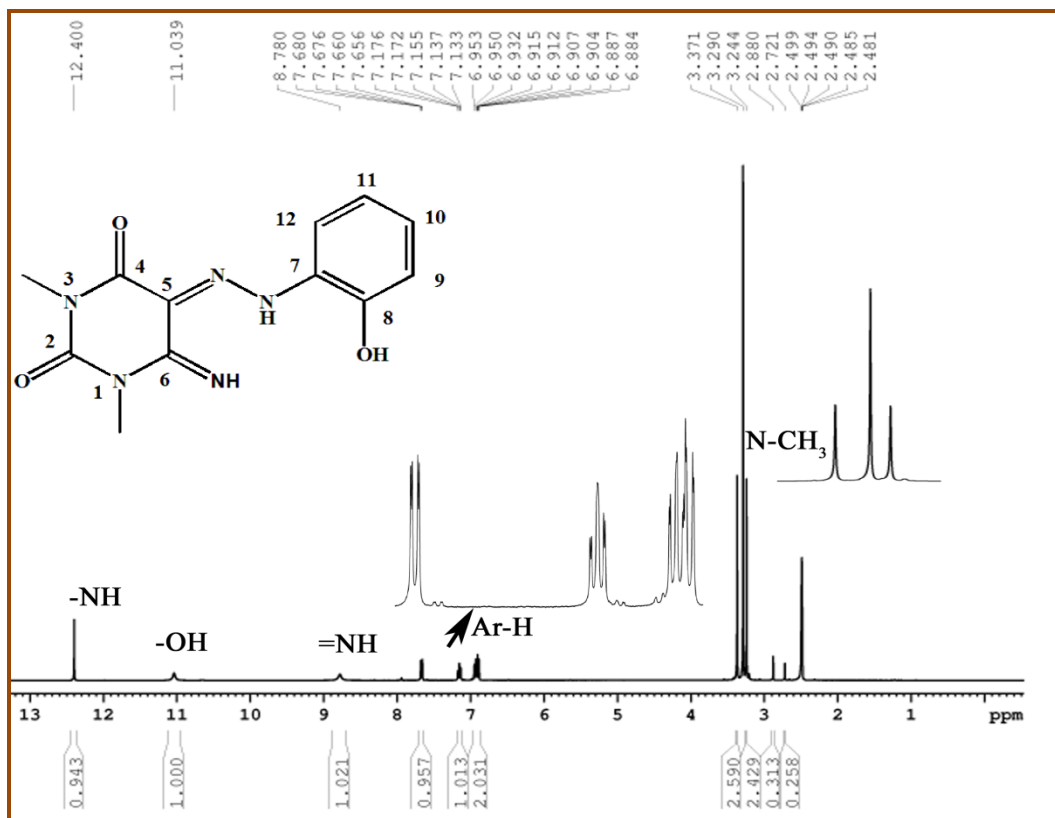

Figure S3. <sup>1</sup>H NMR spectrum of H<sub>2</sub>L, 1

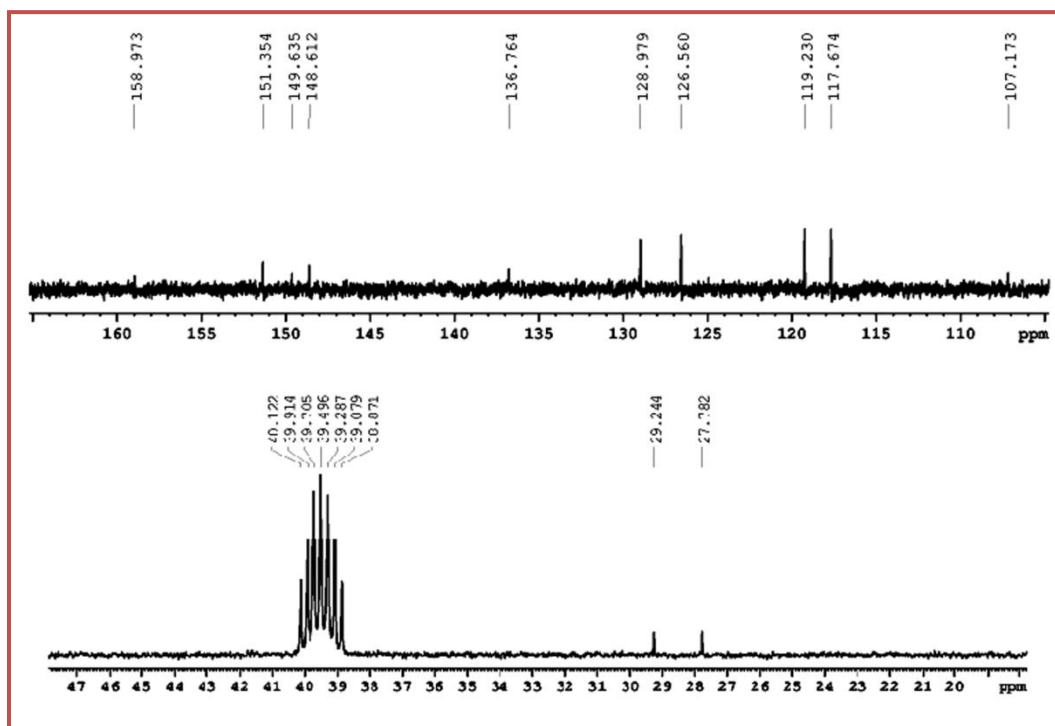

Figure S4. <sup>13</sup>C NMR spectrum of H<sub>2</sub>L, 1

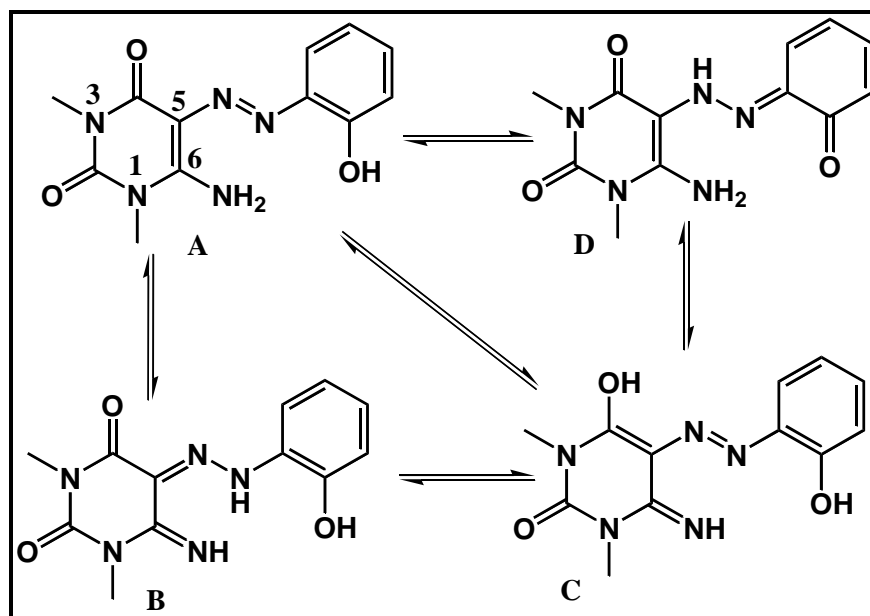

**Scheme S1.** Possible tautomeric forms of H<sub>2</sub>L

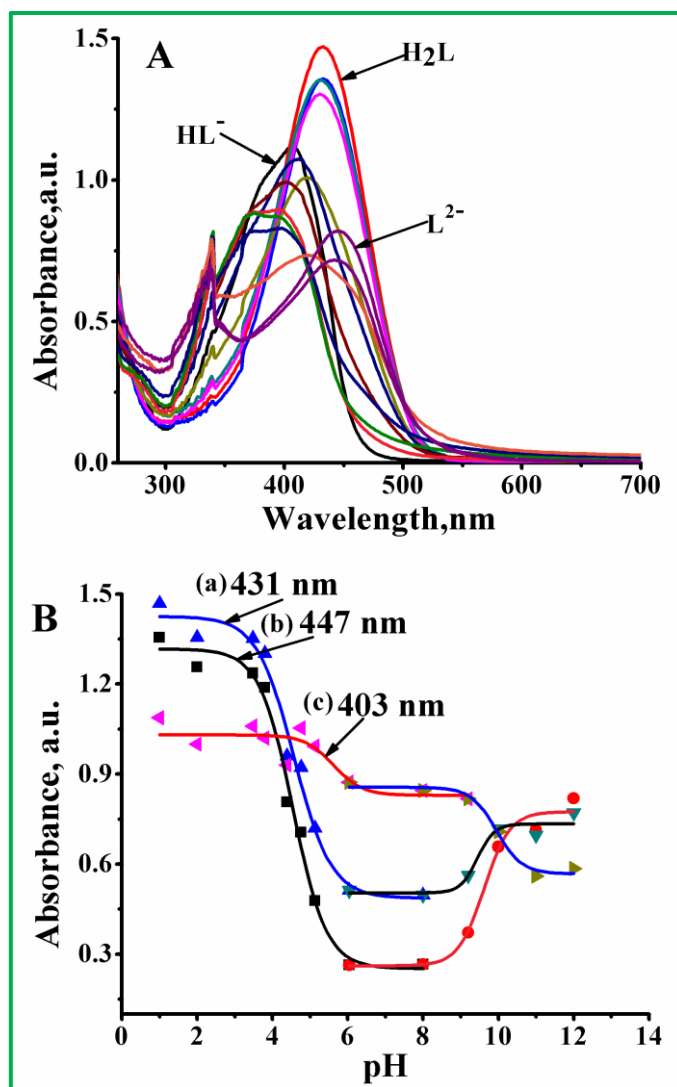

**Figure S5.** (A) UV-vis spectra of  $H_2L$ , 1 at different buffer solutions; (B) Plot of absorbance vs pH of different buffer solutions at (a) 431 nm, (b) 447 nm, and (c) 403 nm.

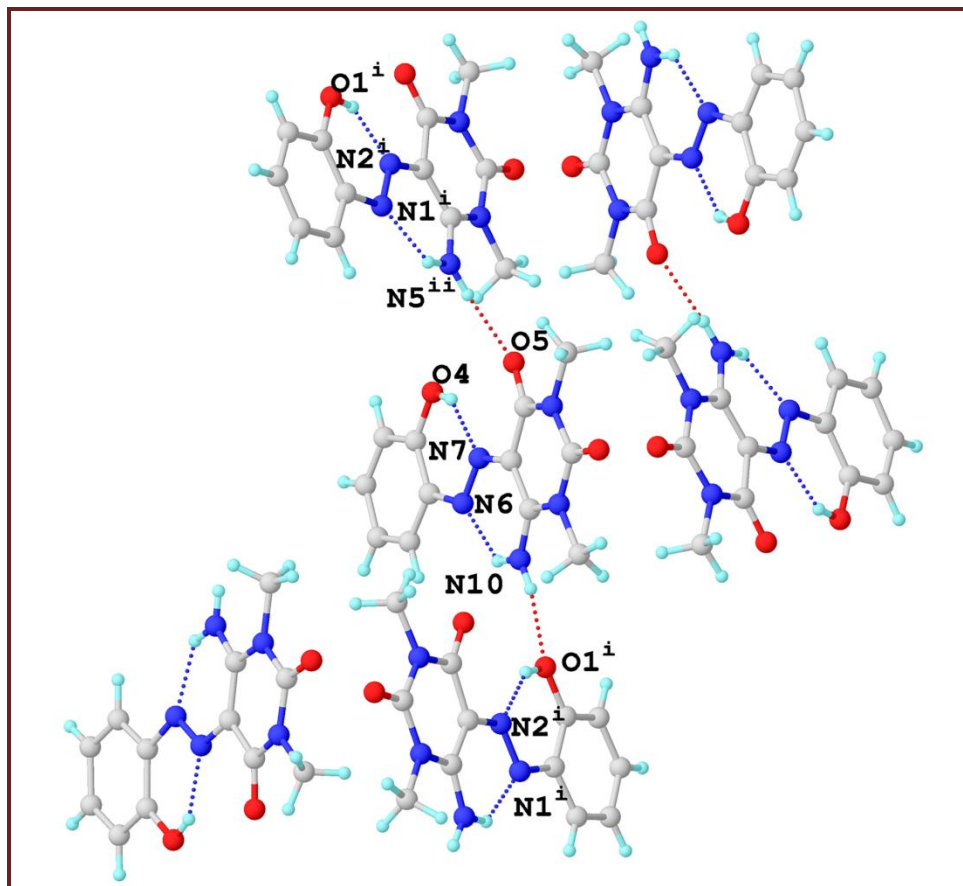

**Figure S6.** H-bonded network present in H<sub>2</sub>L.

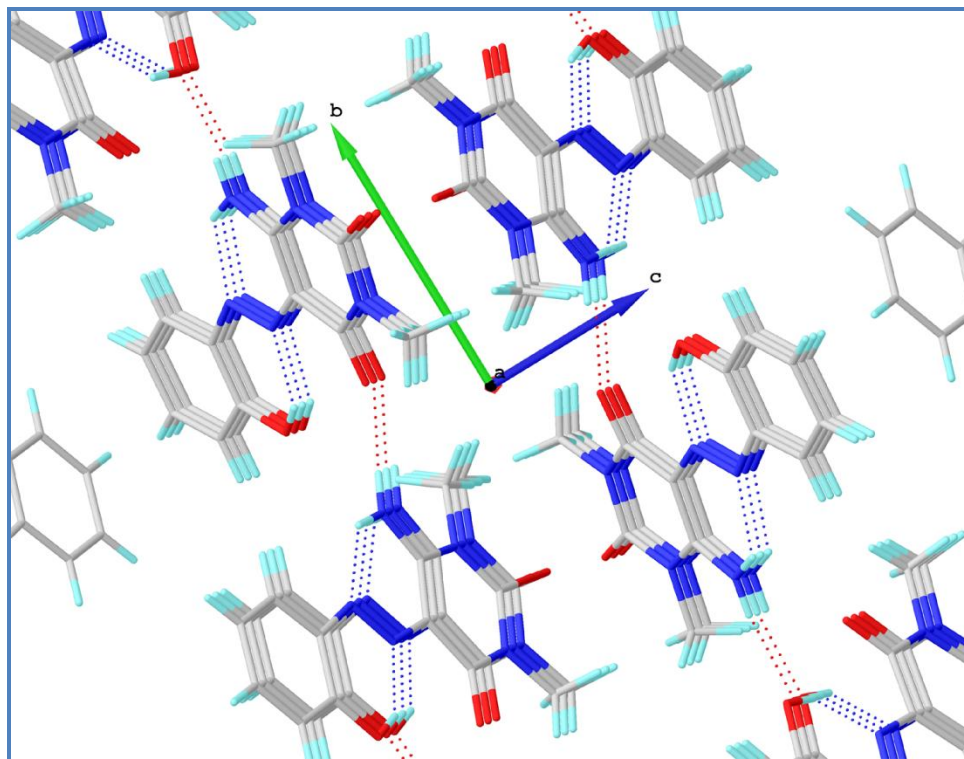

**Figure S7.** Stacking feature of H<sub>2</sub>L.

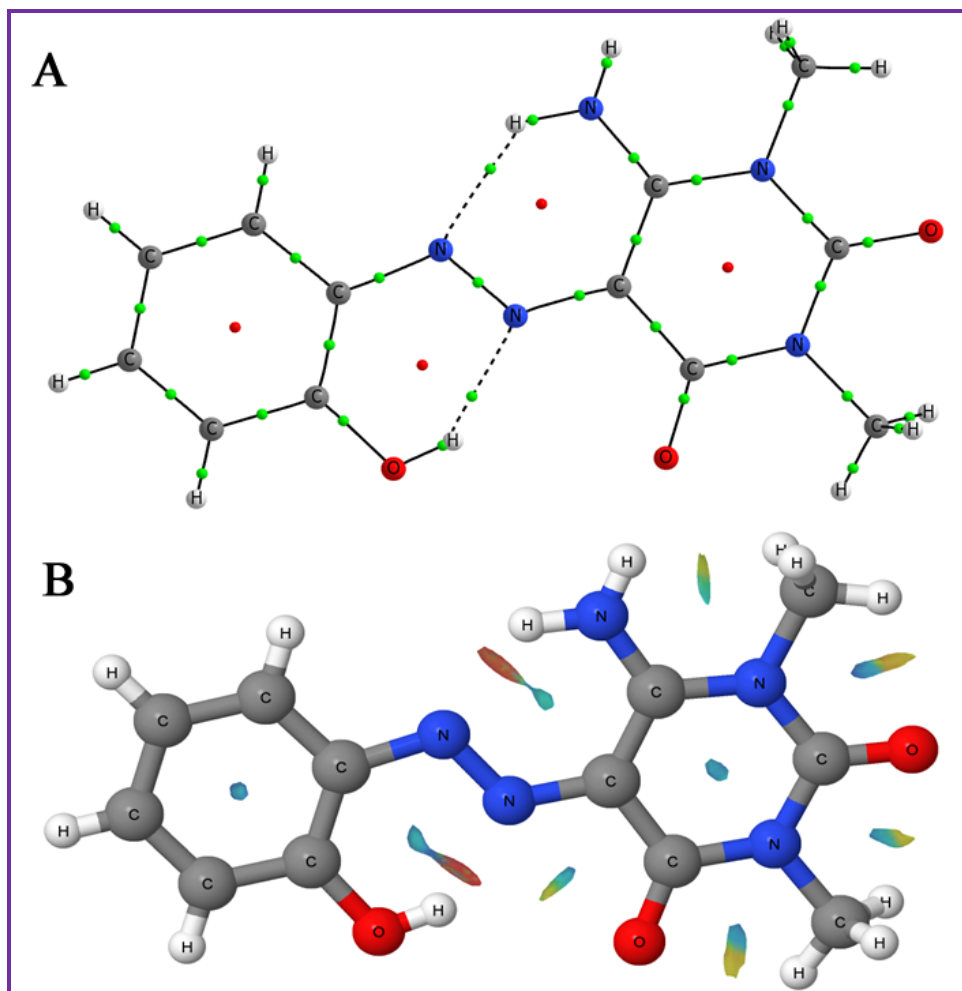

**Figure S8.** (A) AIM molecular graph and (B) NCI plot of the intramolecular interaction in the molecule, **1**. The green, red and blue dots in the molecular graph indicate the position of the bond, ring and cage critical points. The green colored isosurface of the NCIplot is an indication of moderate attractive interaction.



**Table S1.** pKa value of H<sub>2</sub>L

| H <sub>2</sub> L |                             | Spectrophotometric Half-Height Method                           |                                                                           |                                                                                |                                                                 |
|------------------|-----------------------------|-----------------------------------------------------------------|---------------------------------------------------------------------------|--------------------------------------------------------------------------------|-----------------------------------------------------------------|
| pH               | $\lambda_{\text{max}}$ , nm | pKa<br>(at $\lambda_{\text{H2L}} = 431$ nm,<br>hydrazo-phenol)  | pKa<br>(at $\lambda_{\text{HL}^-} = 403$ nm,<br>hydrazo anion-<br>phenol) | pKa<br>(at $\lambda_{\text{L}^{2-}} = 447$ nm,<br>hydrazo-phenolic<br>dianion) | pKa<br>(Mean)                                                   |
| 1                | 431                         | pK <sub>1</sub> = 4.58<br><br>and<br><br>pK <sub>2</sub> = 9.45 | pK <sub>1</sub> = 5.60<br><br>and<br><br>pK <sub>2</sub> = 9.96           | pK <sub>1</sub> = 4.56<br><br>and<br><br>pK <sub>2</sub> = 9.62                | pK <sub>1</sub> = 4.91<br><br>and<br><br>pK <sub>2</sub> = 9.68 |
| 2                | 431                         |                                                                 |                                                                           |                                                                                |                                                                 |
| 3.48             | 430                         |                                                                 |                                                                           |                                                                                |                                                                 |
| 3.8              | 429                         |                                                                 |                                                                           |                                                                                |                                                                 |
| 4.39             | 419                         |                                                                 |                                                                           |                                                                                |                                                                 |
| 4.76             | 413                         |                                                                 |                                                                           |                                                                                |                                                                 |
| 5.13             | 403, 371                    |                                                                 |                                                                           |                                                                                |                                                                 |
| 6.04             | 396, 371                    |                                                                 |                                                                           |                                                                                |                                                                 |
| 8                | 396, 371                    |                                                                 |                                                                           |                                                                                |                                                                 |
| 9.2              | 398, 371                    |                                                                 |                                                                           |                                                                                |                                                                 |
| 10               | 422                         |                                                                 |                                                                           |                                                                                |                                                                 |
| 11               | 444                         |                                                                 |                                                                           |                                                                                |                                                                 |
| 12               | 447                         |                                                                 |                                                                           |                                                                                |                                                                 |

**Table S2.** Bond lengths (Å) for H<sub>2</sub>L.

| Bond    | Length (Å) | Bond    | Length (Å) |
|---------|------------|---------|------------|
| C1-C6   | 1.396(2)   | C1-N1   | 1.410(2)   |
| C1-C2   | 1.415(2)   | C2-O1   | 1.349(2)   |
| C2-C3   | 1.392(2)   | C3-C4   | 1.383(3)   |
| C4-C5   | 1.385(3)   | C5-C6   | 1.388(3)   |
| C7-N2   | 1.365(2)   | C7-C12  | 1.401(2)   |
| C7-C8   | 1.446(2)   | C8-O2   | 1.228(2)   |
| C8-N3   | 1.396(2)   | C9-N3   | 1.467(2)   |
| C10-O3  | 1.212(2)   | C10-N3  | 1.377(2)   |
| C10-N4  | 1.393(2)   | C11-N4  | 1.467(2)   |
| C12-N5  | 1.325(2)   | C12-N4  | 1.369(2)   |
| C13-C18 | 1.403(2)   | C13-N6  | 1.412(2)   |
| C13-C14 | 1.413(2)   | C14-O4  | 1.356(2)   |
| C14-C15 | 1.395(2)   | C15-C16 | 1.380(2)   |
| C16-C17 | 1.392(3)   | C17-C18 | 1.381(2)   |
| C19-N7  | 1.366(2)   | C19-C24 | 1.410(2)   |
| C19-C20 | 1.433(2)   | C20-O5  | 1.234(2)   |

|         |            |        |            |
|---------|------------|--------|------------|
| C20-N8  | 1.390(2)   | C21-N8 | 1.465(2)   |
| C22-O6  | 1.212(2)   | C22-N8 | 1.379(2)   |
| C22-N9  | 1.395(2)   | C23-N9 | 1.468(2)   |
| C24-N10 | 1.323(2)   | C24-N9 | 1.370(2)   |
| N1-N2   | 1.2920(19) | N6-N7  | 1.2852(19) |

**Table S3.** Bond angles (°) for H<sub>2</sub>L.

| Bond        | Angle (°)  | Bond        | Angle (°)  |
|-------------|------------|-------------|------------|
| C6-C1-N1    | 116.30(15) | C6-C1-C2    | 119.12(16) |
| N1-C1-C2    | 124.58(15) | O1-C2-C3    | 119.02(16) |
| O1-C2-C1    | 121.50(15) | C3-C2-C1    | 119.48(16) |
| C4-C3-C2    | 120.42(17) | C3-C4-C5    | 120.45(17) |
| C4-C5-C6    | 119.97(17) | C5-C6-C1    | 120.53(17) |
| N2-C7-C12   | 125.87(15) | N2-C7-C8    | 113.15(14) |
| C12-C7-C8   | 120.98(15) | O2-C8-N3    | 120.53(15) |
| O2-C8-C7    | 124.33(16) | N3-C8-C7    | 115.14(14) |
| O3-C10-N3   | 121.68(16) | O3-C10-N4   | 121.49(16) |
| N3-C10-N4   | 116.81(14) | N5-C12-N4   | 119.20(15) |
| N5-C12-C7   | 121.85(15) | N4-C12-C7   | 118.95(15) |
| C18-C13-N6  | 115.74(14) | C18-C13-C14 | 118.96(15) |
| N6-C13-C14  | 125.28(15) | O4-C14-C15  | 117.99(15) |
| O4-C14-C13  | 122.78(15) | C15-C14-C13 | 119.22(15) |
| C16-C15-C14 | 120.74(16) | C15-C16-C17 | 120.46(16) |
| C18-C17-C16 | 119.60(16) | C17-C18-C13 | 120.98(16) |
| N7-C19-C24  | 126.34(15) | N7-C19-C20  | 113.57(14) |
| C24-C19-C20 | 120.09(15) | O5-C20-N8   | 120.09(15) |
| O5-C20-C19  | 123.66(15) | N8-C20-C19  | 116.25(14) |
| O6-C22-N8   | 121.76(16) | O6-C22-N9   | 121.69(16) |
| N8-C22-N9   | 116.54(14) | N10-C24-N9  | 119.63(15) |
| N10-C24-C19 | 121.29(15) | N9-C24-C19  | 119.08(15) |
| N2-N1-C1    | 113.27(14) | N1-N2-C7    | 121.14(14) |
| C10-N3-C8   | 125.06(14) | C10-N3-C9   | 115.26(14) |
| C8-N3-C9    | 119.49(14) | C12-N4-C10  | 122.95(14) |
| C12-N4-C11  | 119.93(14) | C10-N4-C11  | 117.10(14) |
| N7-N6-C13   | 113.36(13) | N6-N7-C19   | 120.53(14) |

|            |            |            |            |
|------------|------------|------------|------------|
| C22-N8-C20 | 124.59(14) | C22-N8-C21 | 116.05(14) |
| C20-N8-C21 | 119.01(14) | C24-N9-C22 | 122.99(14) |
| C24-N9-C23 | 120.16(14) | C22-N9-C23 | 116.84(14) |

**Table S4.** H-bond parameters present in H<sub>2</sub>L

| D-H...A     | d(D-H) | d(H...A) | d(D...A) | <(DHA)  |
|-------------|--------|----------|----------|---------|
| N5H1...N1   | 0.936  | 1.927    | 2.668    | 134.446 |
| O1H1...N2   | 0.841  | 1.763    | 2.491    | 143.803 |
| O1H1... O2  | 0.841  | 2.658    | 3.378    | 144.553 |
| N10H3... O2 | 0.841  | 2.951    | 4.084    | 115.817 |
| N10H4... O1 | 0.841  | 2.016    | 2.844    | 168.316 |
| N5H2... O5  | 0.885  | 1.966    | 2.834    | 166.34  |
| N5H1... O4  | 0.839  | 2.819    | 4.634    | 124.453 |
| N10H3... N6 | 0.972  | 1.924    | 2.667    | 131.241 |
| O5H4... N7  | 2.701  | 1.836    | 2.676    | 69.302  |
| O4H4... N7  | 0.839  | 1.836    | 2.549    | 11.746  |
| O5H5... N5  | 0.885  | 1.965    | 2.834    | 166.364 |

**Table S5.** Bond lengths (Å) for [Cu<sup>II</sup>L]<sub>4</sub> 2H<sub>2</sub>O.

| Bond   | Length (Å) | Bond   | Length (Å) |
|--------|------------|--------|------------|
| Cu1-N5 | 1.900(4)   | Cu1-N1 | 1.920(4)   |
| Cu1-O1 | 1.940(3)   | Cu1-O1 | 1.969(3)   |
| C1-O1  | 1.347(6)   | C1-C2  | 1.394(7)   |
| C1-C6  | 1.403(6)   | C2-C3  | 1.398(7)   |
| C3-C4  | 1.386(7)   | C4-C5  | 1.386(7)   |
| C5-C6  | 1.396(6)   | C6-N1  | 1.408(6)   |
| C7-N2  | 1.337(6)   | C7-C12 | 1.435(6)   |
| C7-C8  | 1.465(6)   | C8-O2  | 1.221(6)   |
| C8-N3  | 1.393(7)   | C9-N3  | 1.471(6)   |
| C10-O3 | 1.199(6)   | C10-N3 | 1.387(6)   |
| C10-N4 | 1.393(6)   | C11-N4 | 1.457(6)   |
| C12-N5 | 1.306(6)   | C12-N4 | 1.388(6)   |
| N1-N2  | 1.282(5)   | O1-Cu1 | 1.968(3)   |

**Table S6.** Bond angles (°) for [Cu<sup>II</sup>L]<sub>4</sub> 2H<sub>2</sub>O.

| Bond       | Angle (°)  | Bond       | Angle (°)  |
|------------|------------|------------|------------|
| N5-Cu1-N1  | 91.39(16)  | N5-Cu1-O1  | 173.15(15) |
| N1-Cu1-O1  | 84.39(15)  | N5-Cu1-O1  | 95.74(15)  |
| N1-Cu1-O1  | 167.05(15) | O1-Cu1-O1  | 89.45(14)  |
| O1-C1-C2   | 122.6(4)   | O1-C1-C6   | 117.6(4)   |
| C2-C1-C6   | 119.8(4)   | C1-C2-C3   | 119.1(4)   |
| C4-C3-C2   | 121.2(5)   | C3-C4-C5   | 119.8(4)   |
| C4-C5-C6   | 119.9(4)   | C5-C6-C1   | 120.3(4)   |
| C5-C6-N1   | 126.2(4)   | C1-C6-N1   | 113.6(4)   |
| N2-C7-C12  | 127.4(4)   | N2-C7-C8   | 112.8(4)   |
| C12-C7-C8  | 119.7(4)   | O2-C8-N3   | 119.6(4)   |
| O2-C8-C7   | 124.2(5)   | N3-C8-C7   | 116.2(4)   |
| O3-C10-N3  | 121.8(4)   | O3-C10-N4  | 122.4(5)   |
| N3-C10-N4  | 115.8(4)   | N5-C12-N4  | 119.9(4)   |
| N5-C12-C7  | 122.5(4)   | N4-C12-C7  | 117.6(4)   |
| N2-N1-C6   | 117.1(4)   | N2-N1-Cu1  | 130.5(3)   |
| C6-N1-Cu1  | 112.4(3)   | N1-N2-C7   | 121.0(4)   |
| C10-N3-C8  | 125.6(4)   | C10-N3-C9  | 116.1(4)   |
| C8-N3-C9   | 118.0(4)   | C12-N4-C10 | 124.8(4)   |
| C12-N4-C11 | 120.0(4)   | C10-N4-C11 | 115.1(4)   |
| C12-N5-Cu1 | 126.7(3)   | C1-O1-Cu1  | 112.0(3)   |
| C1-O1-Cu1  | 124.5(3)   | Cu1-O1-Cu1 | 122.14(16) |

**Table S7.** Cu<sub>4</sub> clusters of the present study with the literature (Ref. 24a).

| Parameter                | Cu <sub>4</sub> cluster, present study                      | Cu <sub>4</sub> cluster, Ref. 24a                           |
|--------------------------|-------------------------------------------------------------|-------------------------------------------------------------|
| Ligand                   | 1,3-Dimethyl-5-( <i>o</i> -hydroxy-phenylazo)-6-aminouracil | 1,3-Dimethyl-5-( <i>o</i> -carboxy-phenylazo)-6-aminouracil |
| Bridging group           | Phenolate-O                                                 | Carboxylate-O                                               |
| Geometry-around Cu(II)   | Distorted square-planar                                     | In between square-pyramidal and TBP                         |
| Cu <sub>4</sub> -cluster | Doubly opened 4+2 cubane                                    | 87% Tetrahedon and 13% square planar                        |
| Framework                | 8-membered                                                  | 16-membered                                                 |
| Cu---Cu                  | 3.426(11)- 3.498(13) Å                                      | 4.15 - 4.8 Å                                                |
| Crystal                  | tetragonal                                                  | monoclinic                                                  |
| Magnetic property        | Antiferromagnetic ground state                              | Ferromagnetic ground state                                  |
